# Supplementary material
Source: PubMed Central journal article supplement (PMC5647229)
Supplement: NIHMS893278-supplement-supplement_1.pdf [file NIHMS893278-supplement-supplement_1.pdf]

**Supplementary Table 1.** Characteristics and clinical course in patients who developed asymptomatic LVEF decline or symptomatic heart failure

| Age                                         | Baseline CV Risk Factors                                                                                               | Baseline LVEF | Nadir LVEF | Time to cardiac event* | Severe HF (Y/N) | Trastuzumab Interruption | Clinical Details                                                                                                                                                                                                                                                                                                                                  |
|---------------------------------------------|------------------------------------------------------------------------------------------------------------------------|---------------|------------|------------------------|-----------------|--------------------------|---------------------------------------------------------------------------------------------------------------------------------------------------------------------------------------------------------------------------------------------------------------------------------------------------------------------------------------------------|
| <b>Significant LVEF Decline<sup>†</sup></b> |                                                                                                                        |               |            |                        |                 |                          |                                                                                                                                                                                                                                                                                                                                                   |
| 71                                          | HL, CAD, former smoker                                                                                                 | 60            | 48         | 7 months               | N               | Y (permanent)            | At baseline, known CAD with history of PCI and mitral valve prolapse with mitral regurgitation. Asymptomatic LVEF decline at 7 months treated with ACE-I. H was permanently discontinued. LVEF recovered to 61% at 19 months after H discontinuation.                                                                                             |
| 58                                          | HTN, DM, smoking history                                                                                               | 80            | 55         | 3 months               | N               | N                        | History of HTN treated with ramipril. No treatment interruption for asymptomatic LVEF decline.                                                                                                                                                                                                                                                    |
| 76                                          | HTN, HL, CAD, rheumatic heart disease, mitral and aortic valve replacement, chronic atrial fibrillation, BMI $\geq$ 30 | 52            | 33         | 3 months               | N               | Y (permanent)            | Rheumatic heart disease and CAD status post mitral/aortic valve replacements and CABG. HTN treated with metoprolol, valsartan, and aliskiren. LVEF decline to 33% at 3 months, accompanied with NYHA class II symptoms. H permanently discontinued, and symptoms improved with diuretics. 2 months after H discontinuation, LVEF improved to 64%. |

|                                         |                                                                     |    |    |           |   |               |                                                                                                                                                                                                         |
|-----------------------------------------|---------------------------------------------------------------------|----|----|-----------|---|---------------|---------------------------------------------------------------------------------------------------------------------------------------------------------------------------------------------------------|
| 65                                      | HL, DM, smoking history, non-ischemic cardiomyopathy, BMI $\geq$ 30 | 65 | 51 | 3 months  | N | N             | LBBB at baseline with history of LVEF decline to 50%, which normalized to 65% prior to breast cancer treatment. No H interruption.                                                                      |
| 48                                      | None                                                                | 67 | 46 | 6 months  | N | N             | Completed full course of H without interruption and with no heart failure symptoms.                                                                                                                     |
| 73                                      | HTN, HL, DM, CAD, active smoker                                     | 79 | 53 | 1 month   | N | N             | HTN controlled with enalapril at baseline. CAD with history of PCI.                                                                                                                                     |
| 76                                      | HTN, DM, BMI $\geq$ 30                                              | 69 | 53 | 11 months | N | N             | HTN treated with enalapril and amlodipine at baseline. Mild decline in LVEF after completion of H therapy. No cardiac meds initiated.                                                                   |
| 55                                      | None                                                                | 63 | 51 | 8 months  | N | Y (permanent) | No cardiac medications started. 2 months after H discontinued, LVEF recovered to 57%. H was not reinitiated.                                                                                            |
| 70                                      | HTN, smoking history                                                | 67 | 48 | 3 months  | N | Y (temporary) | HTN treated with losartan at baseline. H was held for 6 weeks and losartan was uptitrated. H reinitiated after LVEF improved to 63%. Patient completed full course of H with no recurrent LVEF decline. |
| 42                                      | None                                                                | 77 | 52 | 3 months  | N | Y (permanent) | H permanently discontinued for asymptomatic LVEF decline to 52%. No cardiac meds started. LVEF recovered to 60% at 2 months after H discontinuation.                                                    |
| <b><u>Symptomatic Heart Failure</u></b> |                                                                     |    |    |           |   |               |                                                                                                                                                                                                         |
| 55                                      | Non-ischemic cardiomyopathy                                         | 66 | 47 | 7 months  | Y | Y (permanent) | History of arrhythmogenic right ventricular cardiomyopathy and                                                                                                                                          |

|    |                          |    |    |          |   |               |                                                                                                                                                                                                   |
|----|--------------------------|----|----|----------|---|---------------|---------------------------------------------------------------------------------------------------------------------------------------------------------------------------------------------------|
|    | hy, smoking history      |    |    |          |   |               | frequent PVCs, treated with BB. Developed NYHA class III HF. Treated with diuretics and ACE-I. 3 months after permanent discontinuation of H, LVEF improved to 56%.                               |
| 76 | HTN, HL, smoking history | 52 | 20 | 5 months | Y | Y (permanent) | HTN controlled with CCB at baseline. Developed severe NYHA class IV HF after 5 months of H. Treated with BB, ACE-I, and diuretics. LVEF recovered to 58% at 15 months after discontinuation of H. |

† LVEF decline without severe (NYHA class III/IV) heart failure

\* Time to onset of severe heart failure or LVEF decline after initiation of anti-HER2 therapy

ACE-I, angiotensin-converting enzyme inhibitor; BB, beta blocker; BMI, body mass index; CABG, coronary artery bypass grafting; CAD, coronary artery disease; DM, diabetes mellitus; H, trastuzumab; HF, heart failure; HTN, hypertension; HL, hyperlipidemia; NYHA, New York Heart Association; PCI, percutaneous coronary intervention; PVC, premature ventricular contraction
